# Supplementary material
Source: PubMed Central journal article supplement (PMC5975379)
Supplement: NIHMS968863-supplement-B.pdf [file NIHMS968863-supplement-B.pdf]

## Online Appendix B

### 1. BIONICS trial leadership:

#### Executive Committee

| Committee Member      | Affiliation                                           |
|-----------------------|-------------------------------------------------------|
| Gregg W. Stone, MD    | Cardiovascular Research Foundation, New York, NY, USA |
| Ori Ben-Yehuda, MD    | Cardiovascular Research Foundation, New York, NY, USA |
| David E. Kandzari, MD | Piedmont Heart Institute, Atlanta, Georgia, USA       |
| Pieter Smits, MD, PhD | Maasstad Ziekenhuis, Rotterdam, The Netherlands       |
| Yoram Richter, PhD    | Medinol Ltd., Tel Aviv, Israel                        |

#### Data Safety Monitoring Board (DSMB)

| DSMB Member                          | Affiliation                                                            |
|--------------------------------------|------------------------------------------------------------------------|
| John A. Ambrose, MD                  | UCSF Fresno, CA, USA                                                   |
| Harold L. Dauerman, MD               | University of Vermont/ Fletcher Allen Health Care, Burlington, VT, USA |
| Adnan Kastrati MD                    | Technical University, Munich, Germany                                  |
| Dr. Michael Parides, Biostatistician | Mount Sinai Hospital, New York, NY, USA                                |

#### Clinical Events Committee (CEC)

| Board Member                  | Affiliation                               |
|-------------------------------|-------------------------------------------|
| Steven Marx, MD (Chairman)    | Columbia Medical Center, New York, NY USA |
| Ozgen Dogan, MD (Co-Chairman) | Columbia Medical Center, New York, NY USA |
| David Engel, MD               | Columbia Medical Center, New York, NY USA |
| Kishore J. Harjai, MD         | Columbia Medical Center, New York, NY USA |
| Stanley Schneller, MD         | Columbia Medical Center, New York, NY USA |

## 2. BIONICS trial participating centers:

| Country        | Investigator Name                  | Site Name                                                        |
|----------------|------------------------------------|------------------------------------------------------------------|
| USA            | J. Dawn Abbott                     | Rhode Island Hospital                                            |
|                | Robert Applegate                   | Wake Forest University Health Sciences Medical Center            |
|                | Arthur Szyniszewski                | Michigan Heart & Vascular Institute at St. Joseph Mercy Hospital |
|                | William Bachinsky                  | Pinnacle Health Cardiovascular Institute, Wormleysburg Office    |
|                | James Blankenship                  | Geisinger Clinic                                                 |
|                | Somjot Brar                        | Kaiser Permanente - Los Angeles Medical Center                   |
|                | Sorin Brener                       | New York Methodist Hospital                                      |
|                | Subhash Banerjee                   | Dallas VAMC                                                      |
|                | Maurice Buchbinder                 | Foundation for Cardiovascular Medicine                           |
|                | Jeffrey Chambers                   | Metropolitan Cardiology Consultants                              |
|                | Harish Chandna                     | Victoria Heart and Vascular Center                               |
|                | Michael Chang                      | Mercy Heart & Vascular Institute                                 |
|                | Edward Terrien                     | Fletcher Allen Health Care                                       |
|                | Robert Feldman                     | MediQuest Research Group Inc.                                    |
|                | William French                     | Harbor - UCLA Medical Center                                     |
|                | Wilson Ginete                      | Essentia Health St. Mary's-Heart & Vascular Center               |
|                | Paul Gordon                        | The Miriam Hospital                                              |
|                | Steven Guidera                     | Doylestown Hospital                                              |
|                | David Kandzari                     | Piedmont Healthcare                                              |
|                | John Katopodis                     | TALLAHASSEE RESEARCH INSTITUTE, Inc                              |
|                | Sumant Lamba                       | First Coast Cardiovascular Institute                             |
|                | Rajiv Jauhar                       | Lenox Hill Hospital                                              |
|                | Ethisham Mahmud                    | UCSD Sulpizio Cardiovascular Center                              |
|                | Neville Mistry                     | Sentara Cardiovascular Research Institute                        |
|                | Brent McLaurin                     | Anmed Health MC                                                  |
|                | Kendrick Shunk                     | San Francisco VA Medical Center                                  |
|                | James Smith                        | Florida Hospital Pepin Heart Institute                           |
|                | Aylmer Tang                        | Chambersburg Hospital                                            |
|                | Ron Waksman                        | Medstar Washington Hospital Center                               |
|                | John Wang                          | MedStar Union Memorial Hospital                                  |
|                | Alan Wiseman                       | Eastern Maine Medical Center                                     |
|                | Arash Arshi                        | Ohio Health Research Institute                                   |
|                | Vafa Mansouri                      | Saint Thomas Health                                              |
|                | Anthony Smeglin                    | Lourdes Cardiology Services                                      |
| Jan Skowronski | Rockford Cardiovascular Associates |                                                                  |
| Rajiv Jauhar   | North Shore University Hospital    |                                                                  |

| Country            | Investigator Name  | Site Name                                        |
|--------------------|--------------------|--------------------------------------------------|
|                    | Rajiv Jauhar       | Long Island Jewish Hospital                      |
|                    | Manish Parikh      | Columbia University Medical Center               |
|                    | Richard Shlofmitz  | St. Francis Hospital                             |
| <b>Canada</b>      | Benoit Tremblay    | Centre Hospitalier Universitaire de Quebec       |
|                    | Neil Brass         | Royal Alexandra Hospital, CK Hui Heart Centre    |
|                    | Michael Curtis     | University of Calgary, Foothills Medical Center  |
|                    | Ashok Mukherjee    | Scarborough Cardiology Research                  |
|                    | Michael Love       | Queen Elizabeth II Health Sciences Centre        |
|                    | Samer Mansour      | Centre Hospitalier de l'Universite de Montreal   |
|                    | Simon Robinson     | Victoria Heart Institute Foundation              |
|                    | Andrea MacDougall  | Thunder Bay Regional Health Sciences Centre      |
|                    | Robert Teskey      | Horizon Health Network                           |
| <b>Belgium</b>     | Luc Janssens       | Imelda Hospital                                  |
|                    | Victor Legrand     | CHU de Liège                                     |
|                    | Stefan Verheye     | ZNA Middleheim                                   |
| <b>Israel</b>      | Yaron Almagor      | Sha'are Zedek Medical Center                     |
|                    | Shmuel Banai       | Tel-Aviv Sourasky Medical Center                 |
|                    | Haim Danenberg     | Hadassah Hebrew University Medical Center        |
|                    | Michael Jonas      | Kaplan Medical Center                            |
|                    | Ran Kornowski      | Golda Campus SubSite of 404 Rabin Medical Center |
|                    | Ran Kornowski      | Rabin Medical Center                             |
|                    | Uri Rosenschein    | Bnai Zion Medical Center                         |
|                    | Itzhak Herz        | Laniado Medical Center                           |
| <b>Italy</b>       | Alaide Chieffo     | San Raffaele Hospital                            |
|                    | Giuseppe Musumeci  | AO Papa Giovanni XXIII Bergamo                   |
|                    | Salvatore Saccà    | Mirano General Hospital                          |
| <b>Netherlands</b> | Willem Dewilde     | Amphia Hospital                                  |
|                    | Maurits Dirksen    | Medical Center Alkmaar                           |
|                    | Jose Henriques     | Academic Medical Centre                          |
|                    | Peter Smits        | Maasstad Ziekenhuis                              |
|                    | Pim Tonino         | Catherina Ziekenhuis                             |
|                    | Jan Van der Heyden | St. Antonius Ziekenhuis                          |
| <b>Poland</b>      | Pawel Buszman      | PAKS II Oddzial Kardiologiczny, Bielsko-Biala    |
|                    | Maciej Pruski      | Polsko Amerykanske Kliniki Serca Tychy           |
|                    | Zajdel Wojciech    | Jan Pawel II Hospital Krakow                     |
|                    | Rafal Wyderka      | Zgierskie Centrum Kardiologii Med-Pro            |
| <b>Spain</b>       | Bruno Garcia       | Hospital Vall d'Hebron                           |
|                    | Andres Iniguez     | Hospital Meixoeiro                               |

| Country | Investigator Name           | Site Name                                    |
|---------|-----------------------------|----------------------------------------------|
|         | Javier Goicolea             | Hospital Puerta de Hierro                    |
|         | Jose Maria Hernandez Garcia | Hospital Universitario Virgen de la Victoria |
