# Supplementary material
Source: PubMed Central journal article supplement (PMC5975379)

■ EC ■ SMC

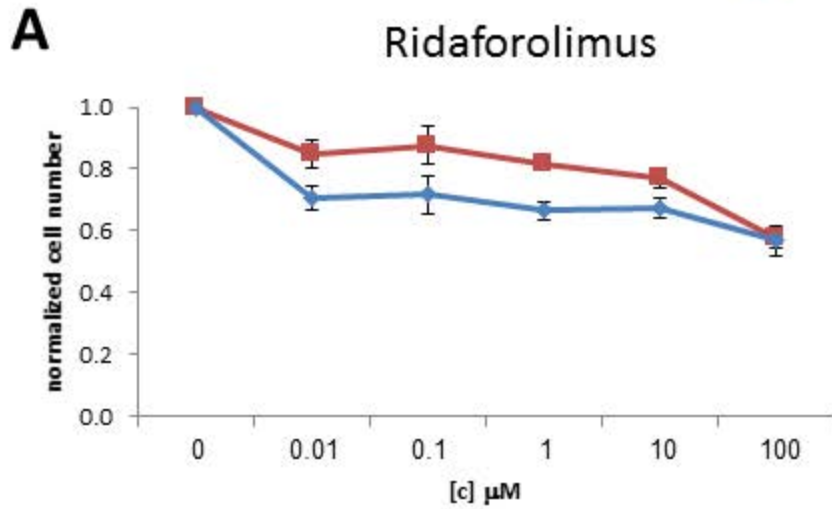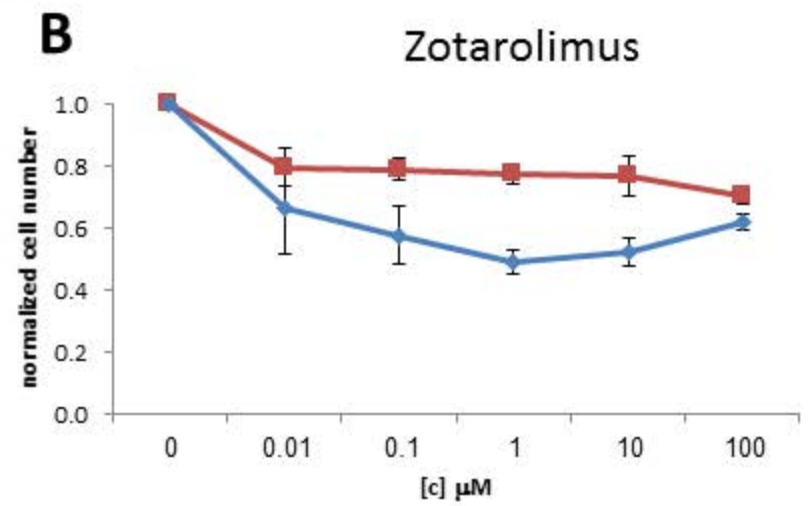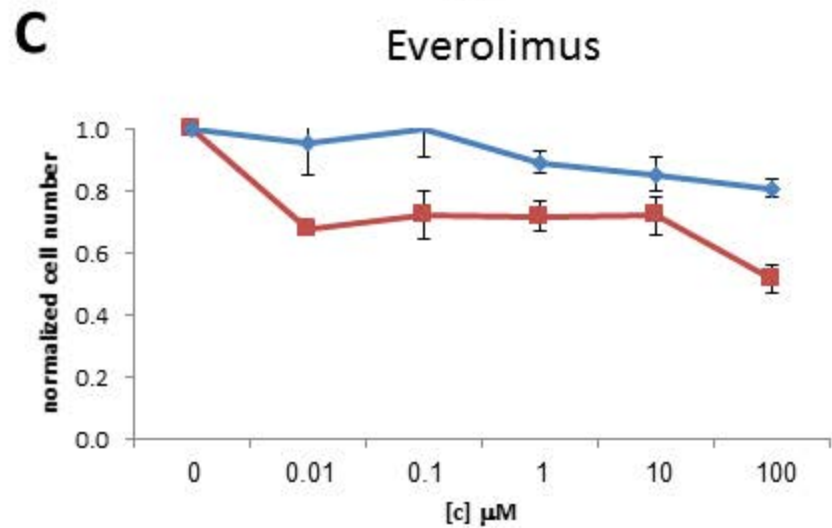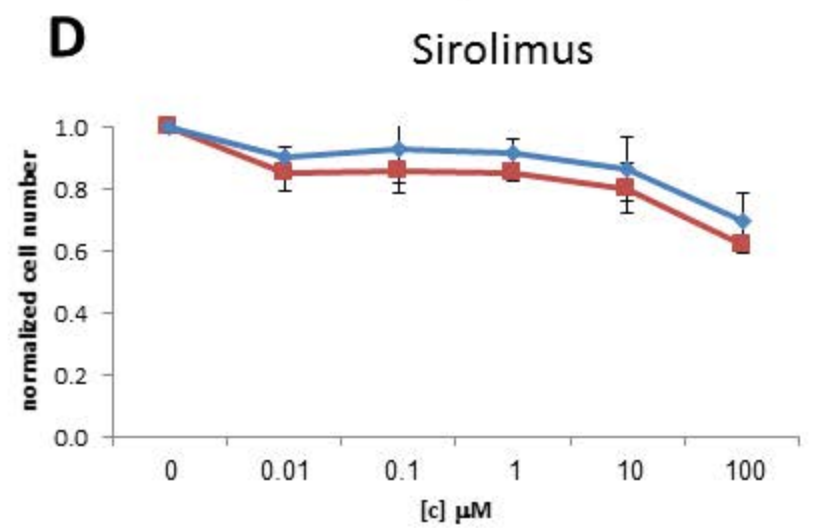

Supplement: NIHMS968863-supplement-A1.pdf [file NIHMS968863-supplement-A1.pdf]

## Percentage Released

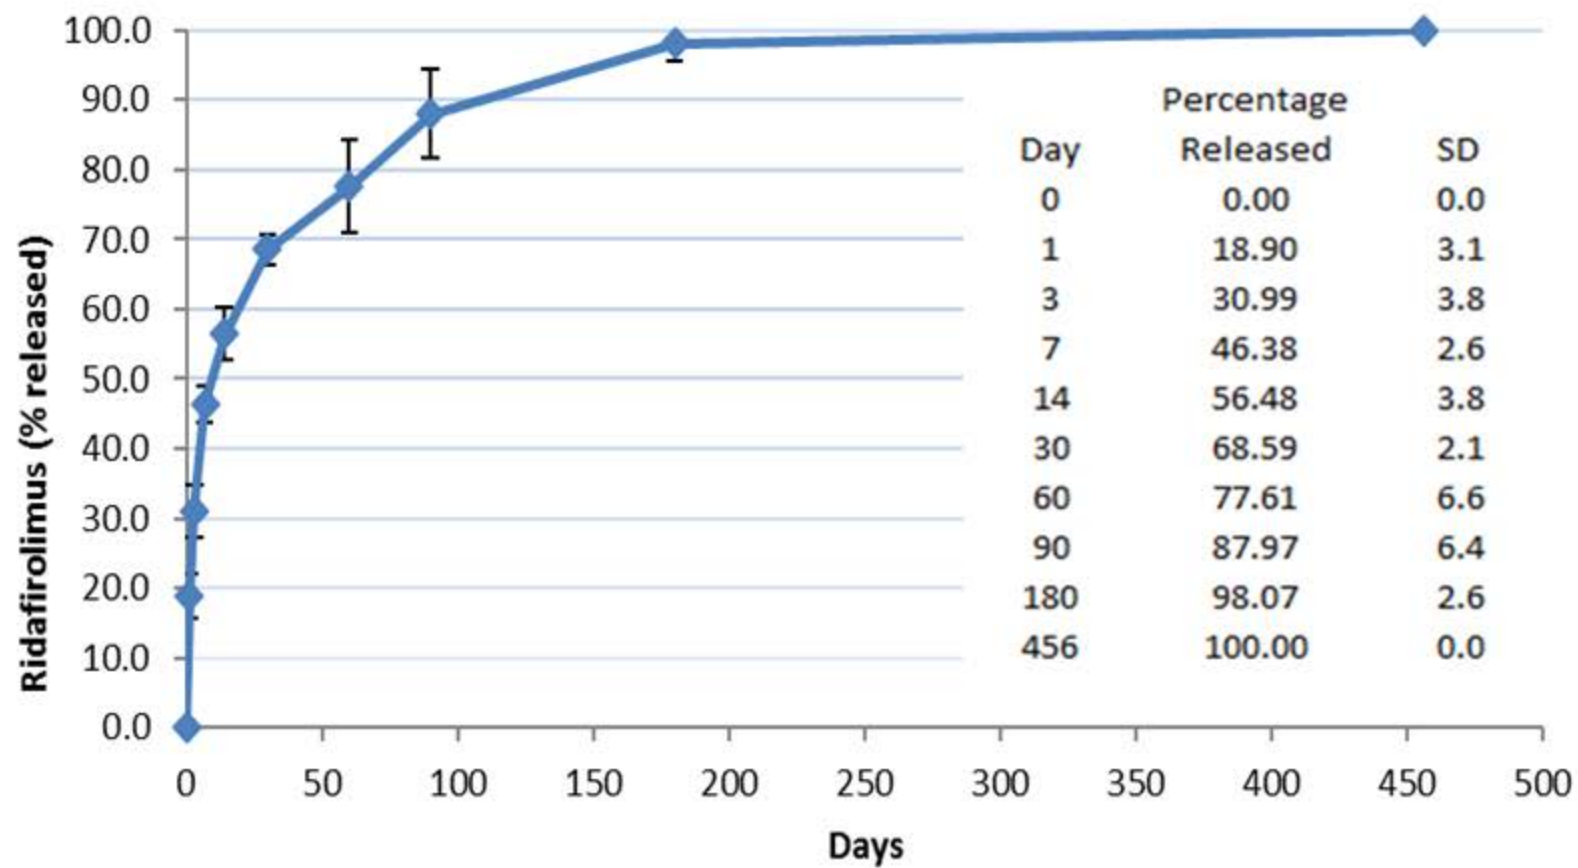

Supplement: NIHMS968863-supplement-A2.pdf [file NIHMS968863-supplement-A2.pdf]

## Stented Artery (ng/mg)

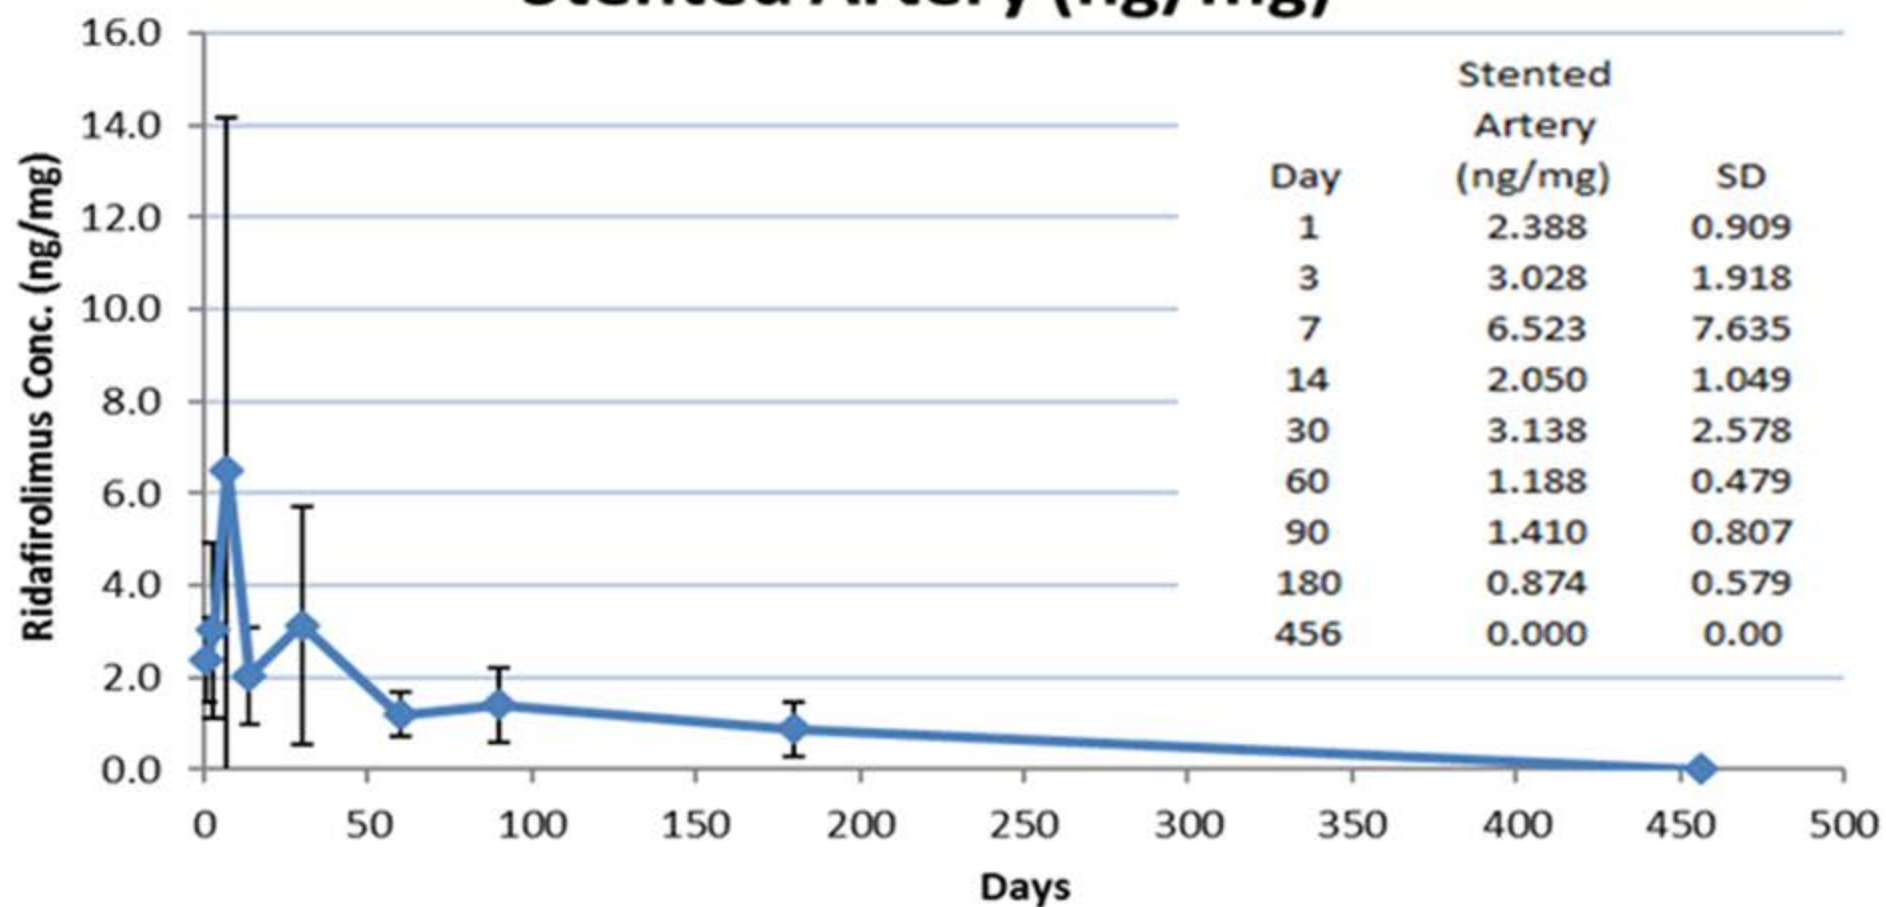

Supplement: NIHMS968863-supplement-A3.pdf [file NIHMS968863-supplement-A3.pdf]
